# Supplementary material for: Vibrational wave-packet dynamics of the silver pentamer probed by femtosecond NeNePo spectroscopy
Source: Royal Society of Chemistry journal article supplement (doi:10.1039/d3cp06229e), 2024-01-01
Supplement: d3cp06229e1.pdf [file d3cp06229e1.pdf]

## Supporting information

### Vibrational Wave-Packet Dynamics of Silver Pentamer Probed by Femtosecond NeNePo Spectroscopy

Max Grellmann,<sup>a</sup> Martin DeWitt,<sup>b</sup> Daniel M. Neumark<sup>b,c</sup> Knut R. Asmis,<sup>a</sup> and Jiaye Jin<sup>\*a</sup>

<sup>a</sup>*Wilhelm-Ostwald-Institut für Physikalische und Theoretische Chemie, Universität Leipzig,  
Linnéstr. 2, 04103, Leipzig, Germany.*

<sup>b</sup>*Department of Chemistry, University of California, Berkeley, CA 94720, USA*

<sup>c</sup>*Chemical Sciences Division, Lawrence Berkeley National Laboratory, Berkeley, CA 94720  
USA*

E-mail: [jiaye.jin@uni-leipzig.de](mailto:jiaye.jin@uni-leipzig.de)

Table S1: Fitting parameters of the frequency contributions for the oscillatory signals shown in Fig. S3 by the function,  $f(t) = \sum_i A_i \cos(2\pi t/T_i + \varphi_i) e^{-t/\tau_i}$ . Details are given in Fig. S3.

| $\lambda_{\text{pump}} = 510 \text{ nm}$ |                                |                    |                     | $\lambda_{\text{pump}} = 402 \text{ nm}$ |                                |                    |                     |
|------------------------------------------|--------------------------------|--------------------|---------------------|------------------------------------------|--------------------------------|--------------------|---------------------|
| $\omega_e \text{ (cm}^{-1}\text{)}$      | $\varphi \text{ (}\pi\text{)}$ | $A \text{ (a.u.)}$ | $\tau \text{ (ps)}$ | $\omega_e \text{ (cm}^{-1}\text{)}$      | $\varphi \text{ (}\pi\text{)}$ | $A \text{ (a.u.)}$ | $\tau \text{ (ps)}$ |
| 256                                      | 0.7                            | 23                 | 1.1                 | 258                                      | 0.7                            | 52                 | 1.3                 |
| 213                                      | 1.0                            | 10                 | 1.2                 | 212                                      | 1.0                            | 10                 | 1.2                 |
| 203                                      | 0.4                            | 8                  | 1.3                 | 201                                      | 0.8                            | 36                 | 1.3                 |
| 158                                      | 0.1                            | 101                | 1.9                 | 156                                      | 0.4                            | 154                | 1.6                 |
| 101                                      | 0.1                            | 129                | 2.5                 | 101                                      | 0.2                            | 185                | 2.1                 |
| 75                                       | 0.4                            | 40                 | 2.1                 | 75                                       | 0.5                            | 64                 | 1.6                 |
| 55                                       | 0.4                            | 70                 | 3.3                 | 56                                       | 0.1                            | 103                | 2.5                 |
| 29                                       | 1.3                            | 11                 | 1.1                 | 26                                       | 2.0                            | 27                 | 1.6                 |

Table S2: Experimental frequencies and calculated harmonic frequencies ( $\omega_e$ , in  $\text{cm}^{-1}$ ) of the totally symmetric vibrational modes of neutral planar  $\text{Ag}_5$  **1** and bipyramidal  $\text{Ag}_5$  **2** using PBE/def2-TZVPP. The displacements of the normal modes for neutral **1** and **2** are present in Fig. S4 and S6. The bipyramidal **2** is calculated to be  $49 \text{ kJ}\cdot\text{mol}^{-1}$  higher than the planar **1** (PBE/def2-TZVPP).

| Fs NeNePo <sup>a</sup> | Raman <sup>b</sup> | Harm. (1) | Harm. (2) |
|------------------------|--------------------|-----------|-----------|
|                        |                    |           | 180       |
| 157                    | 162                | 152       |           |
|                        | 136                | 143       |           |
| 101                    | 105, 100           | 98        | 106       |
|                        |                    |           | 83        |
| 75                     | 68                 | 71        |           |
| 56                     |                    |           | 46        |

<sup>a</sup> Mean Frequencies for two pump wavelengths.

<sup>b</sup> Raman spectroscopy of  $\text{Ag}_5$  in solid argon.<sup>1</sup>

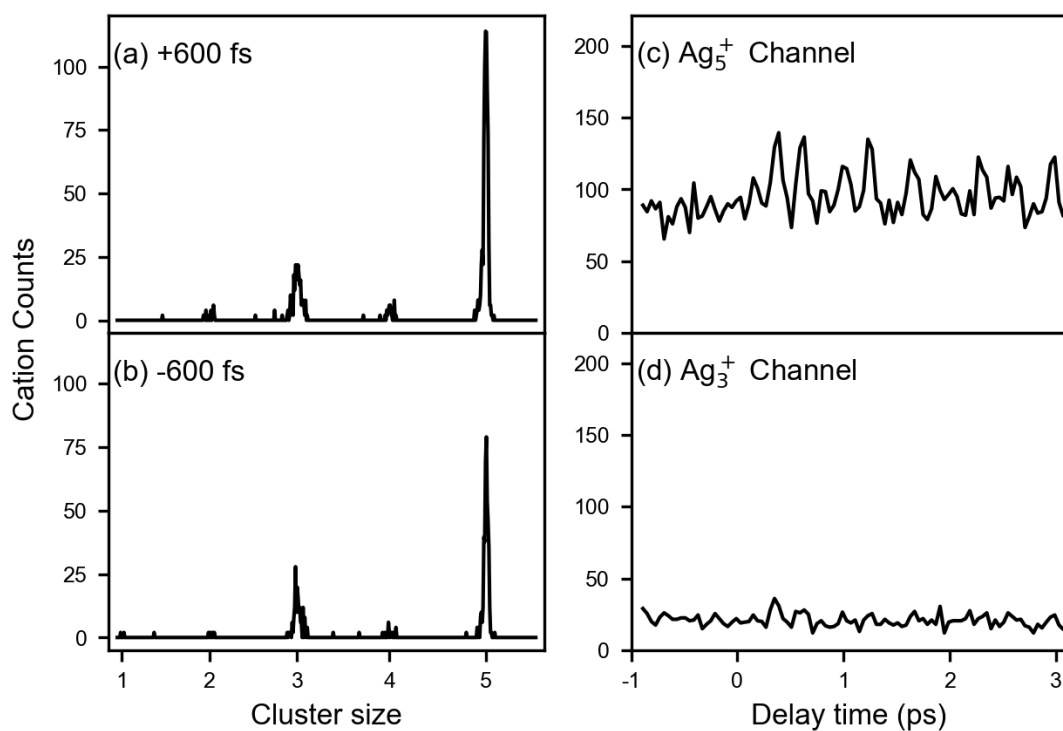

Fig. S1: Quadrupole mass spectra (500 ms accumulation time) of silver cluster cations  $Ag_n^+$  ( $n = 1 - 5$ ) obtained for  $\lambda_{\text{pump}} = 510$  nm and  $\lambda_{\text{probe}} = 402$  nm: (a) delay time = + 600 fs; (b) delay time = -600 fs. Fs NeNePo transients (one scan) obtained for  $Ag_5^+$  cation (c) and  $Ag_3^+$  cation (d) in -1 ps to +3 ps.

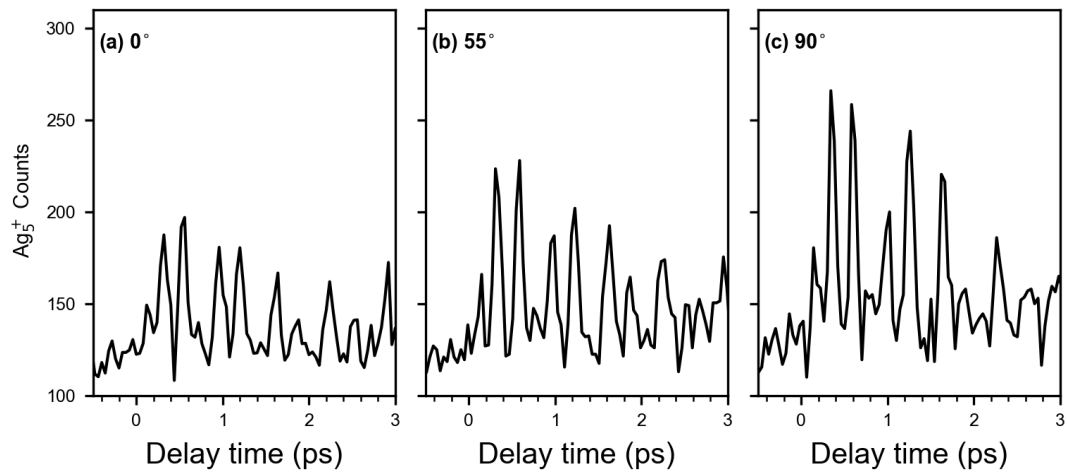

Fig. S2: Two-color fs NeNePo transients ( $\lambda_{\text{pump}} = 510 \text{ nm}$ ,  $\lambda_{\text{probe}} = 402 \text{ nm}$ ) of Ag<sub>5</sub> monitoring the Ag<sub>5</sub><sup>+</sup> signal at different relative polarization angles ( $\theta$ ) over a range of -0.5 to 3.0 ps for (a) 0° (b) 55° and (c) 90°.

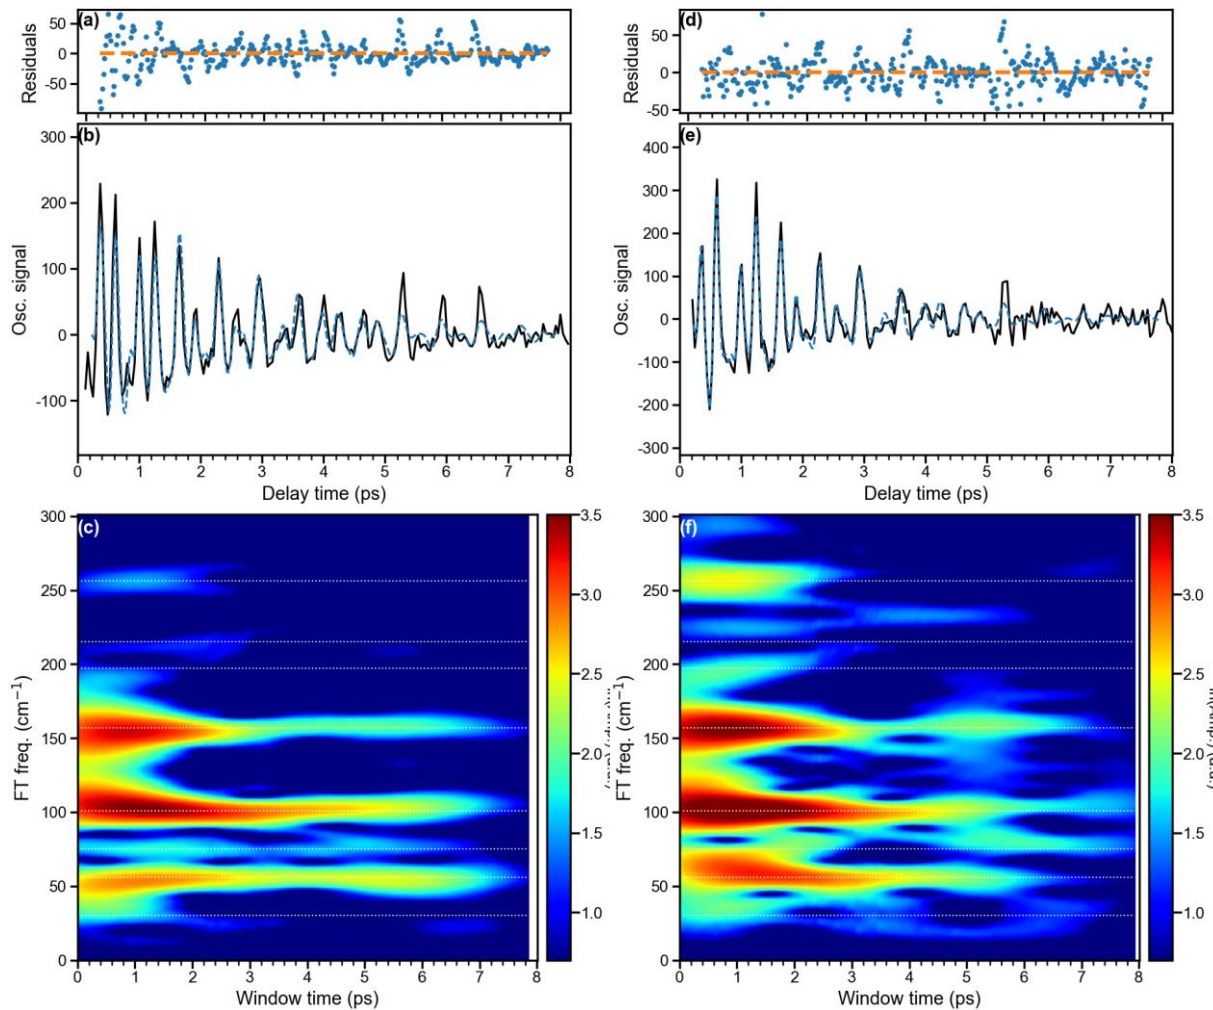

Fig. S3: Oscillatory time-dependent  $\text{Ag}_5^+$  signal (black) and fitting curves (blue) (b) and (e), the fitting residuals (a and d) and STFT spectrograms (c) and (f). (a)-(c) are obtained by a pump pulse of 510 nm. (d)-(f) are obtained by a pump pulse of 402 nm. The experimental oscillations are fitted by a sum over all cosine functions containing all significant frequency contribution, as  $f(t) = \sum_i A_i \cos(2\pi t/T_i + \varphi_i) e^{-t/\tau_i}$ . The initial amplitudes  $A_i$ , oscillation periods  $T_i$  (or frequencies,  $1/(\omega_e c)$ ) and lifetimes ( $\tau_i$ ) are taken from the STFT spectrogram shown in (c) and (f). The initial phases ( $\varphi_i$ ) are set to 0. The fitting results are given in Table S1. The residuals of the fitting curves are given in (a) and (d). The STFT spectrograms are obtained by applying a 4 ps window time, providing a frequency resolution of  $9 \text{ cm}^{-1}$ .

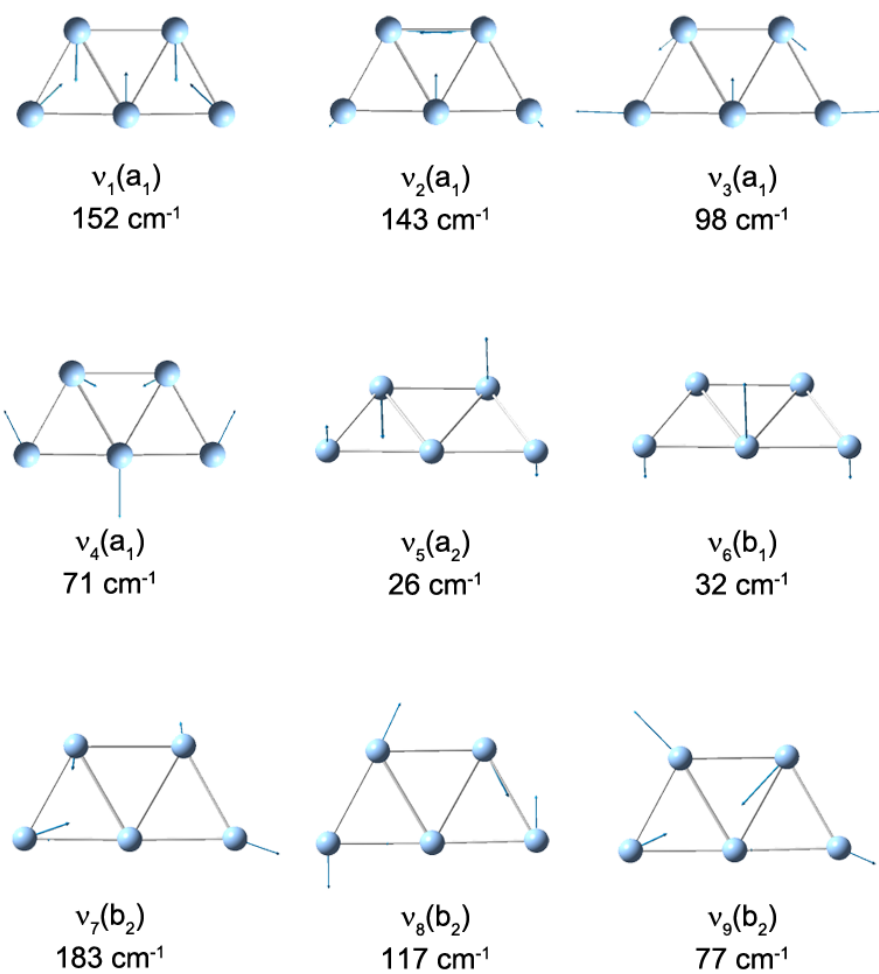

Fig. S4: The nuclear displacements of the harmonic vibrational normal modes of planar  $Ag_5$  1.

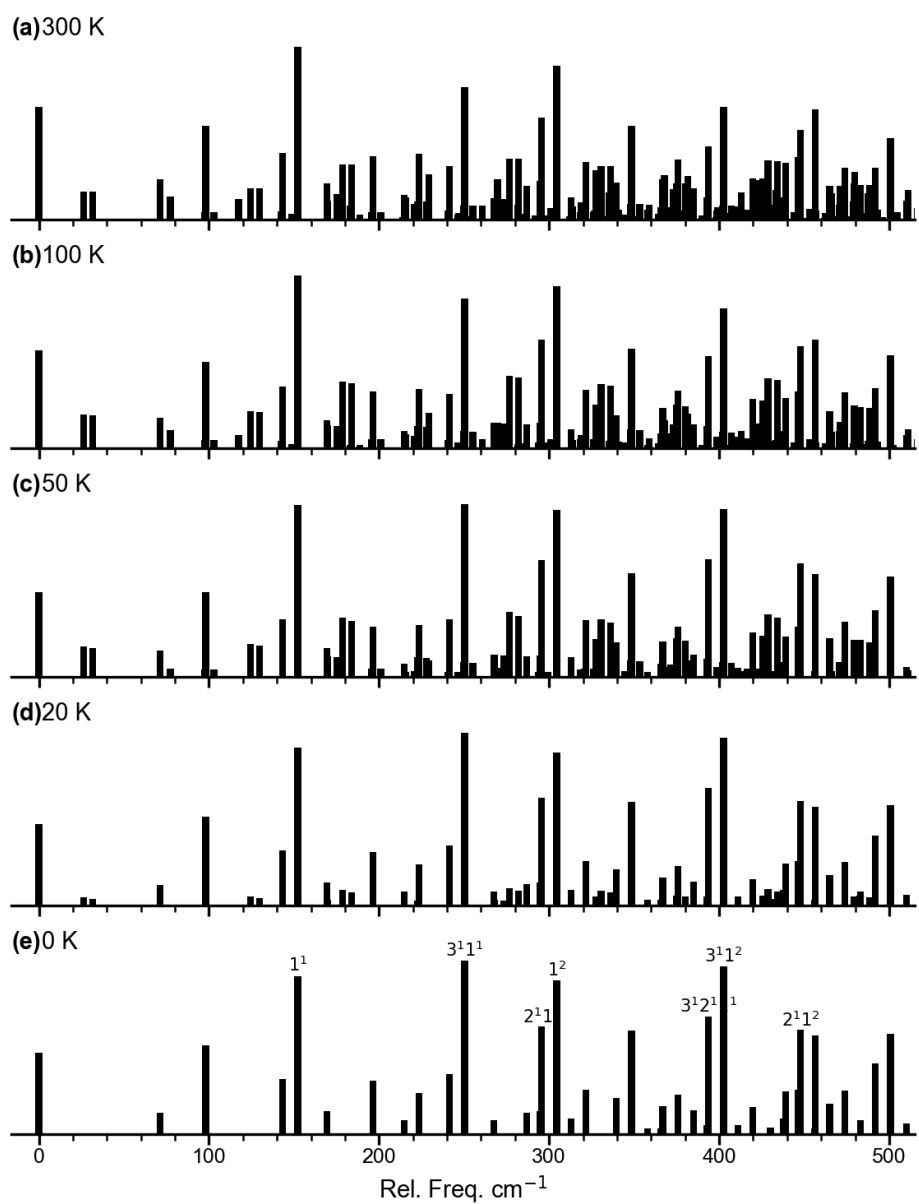

Fig. S5: Distributions of vibrational levels of planar neutral  $\text{Ag}_5$  calculated from Franck-Condon simulations of photodetachment at different temperatures.

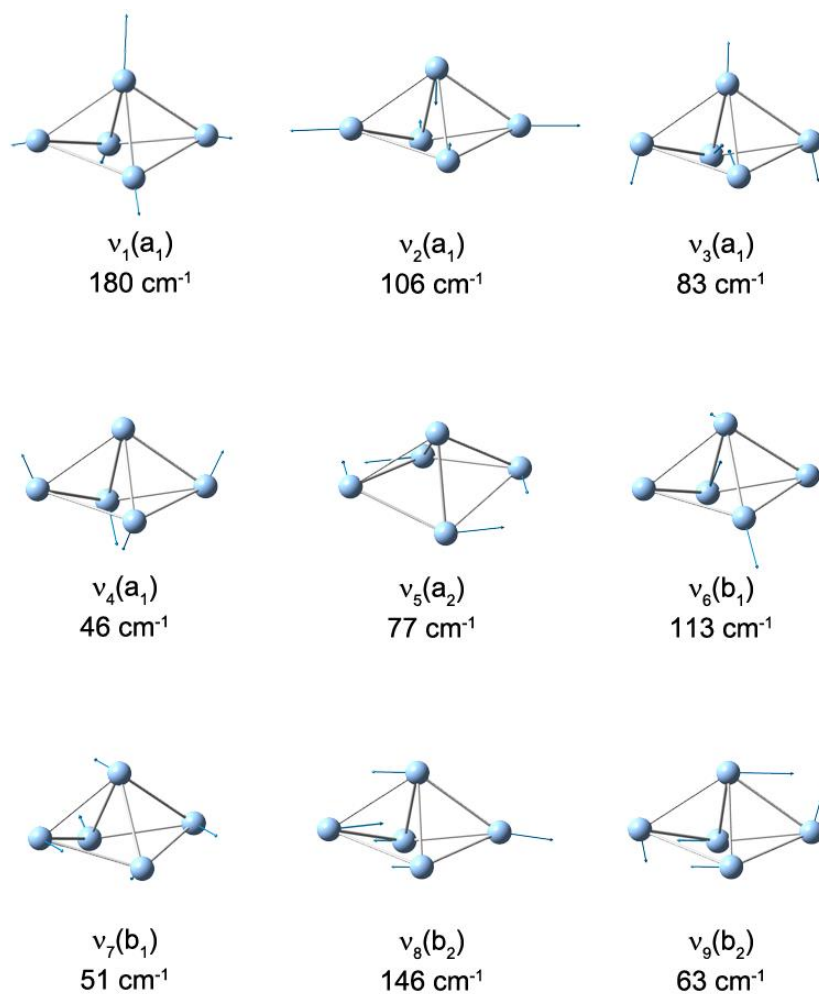

Fig. S6: The nuclear displacements of the harmonic vibrational normal modes of bipyramidal Ag<sub>5</sub> 2.



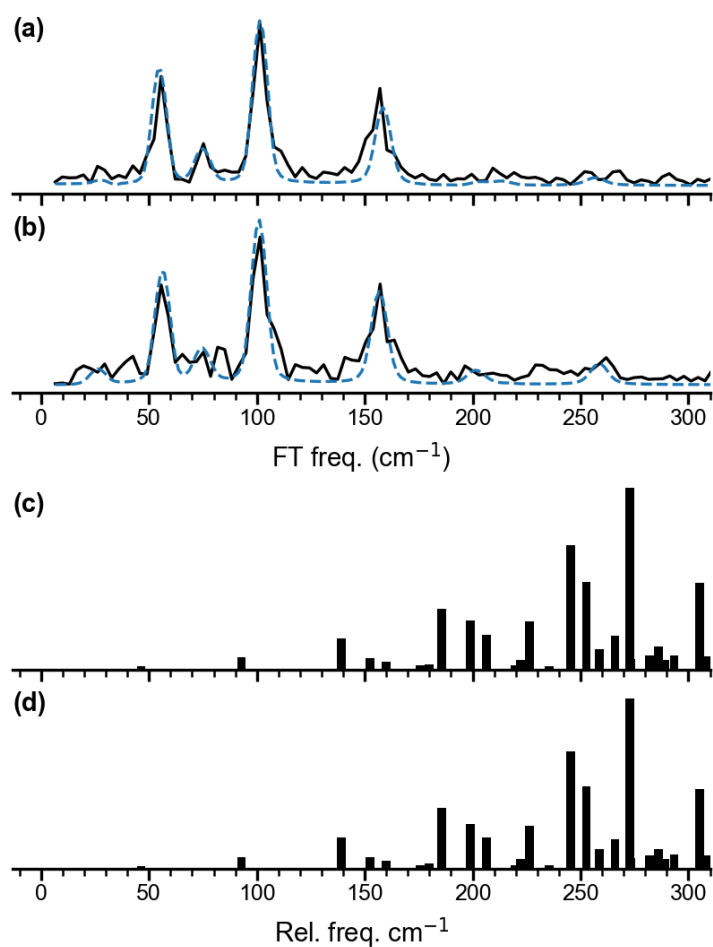

Fig. S7: FT amplitude spectra of the oscillatory  $\text{Ag}_5^+$  yield and the best fitting curves shown in Fig. 2c and d. (a) for  $\lambda_{\text{pump}} = 510$  nm and (b) for  $\lambda_{\text{pump}} = 402$  nm. (c) and (d) Predicted population for the vibrational levels of bipyramidal  $\text{Ag}_5$  **2** determined from the Franck-Condon factors for  $\text{Ag}_5$  ( $^2\text{B}_1, \text{C}_{2v}$ )  $\leftarrow$   $\text{Ag}_5^-$  ( $^3\text{A}_1', \text{D}_{3h}$ ) photodetachment transition at 20 K (c) and 0 K (d).

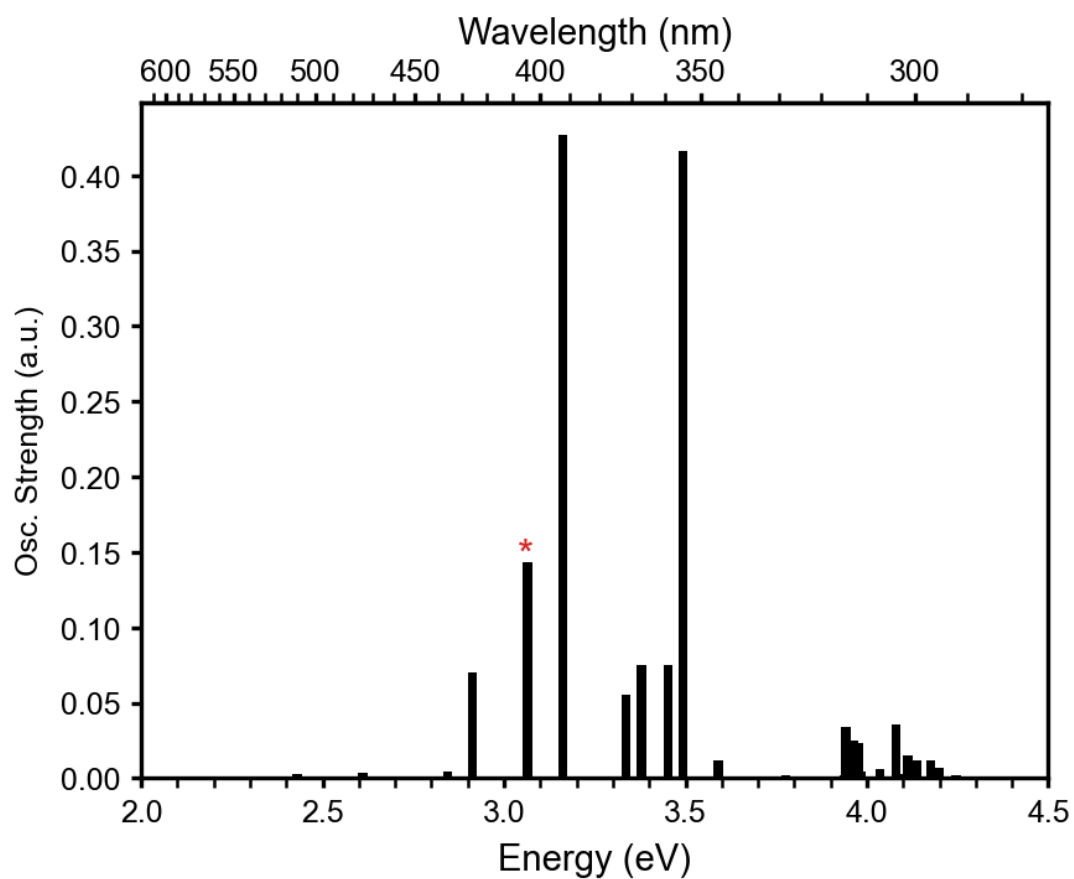

Fig. S8: Calculated excitation energy and oscillator strength of transition for the electronic excited states of  $\text{Ag}_5$  (**1**). The TDDFT calculations are performed using PBE/def2-TZVPP. The results are similar to previous *ab initio* calculations.<sup>2</sup> The hypothesized resonant excited state ( $^2\text{B}_2$ ) is marked in red, which is located at 3.11 eV obtained by ultraviolet-visible absorption spectroscopy of  $\text{Ag}_5$  in neon matrix.<sup>3</sup>

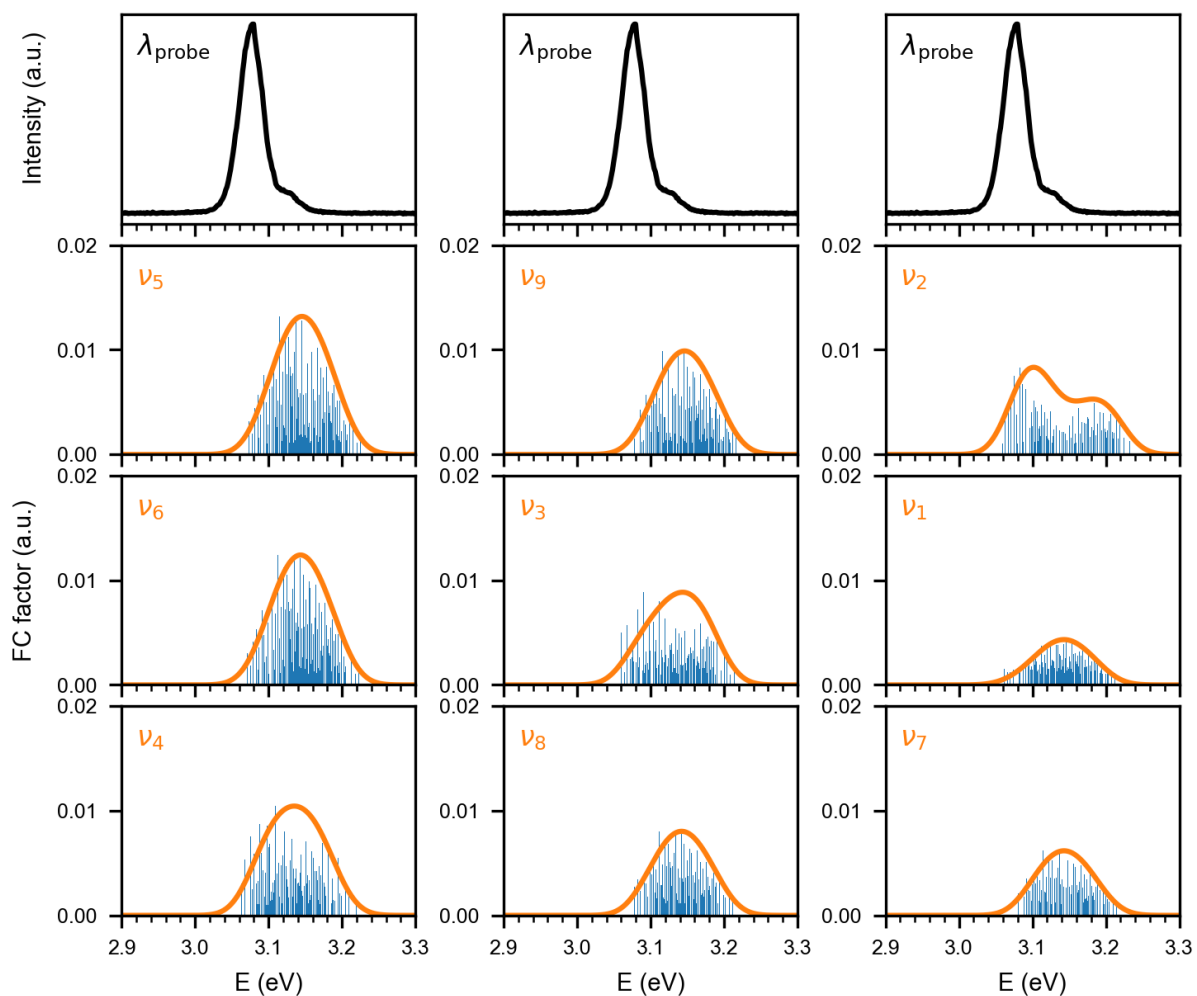

Fig. S9: Calculated Franck-Condon factors of  $\text{Ag}_5 (^2\text{B}_2) \leftarrow \text{Ag}_5 (^2\text{A}_1)$  for each individual vibrational mode. The entire envelopes of the transitions are convoluted by the probe laser width of  $400 \text{ cm}^{-1}$  ( $50 \text{ meV}$ ). The frequency spectrum of the probe pulse is also given.

## References

- (1) Haslett, T. L., Bosnick, K. A., Moskovits, M.  $\text{Ag}_5$  is a planar trapezoidal molecule. *J. Chem. Phys.* **1998**, *108*, 3453.
- (2) Bonačić-Koutecky, V., Veyret, V., Mitrić, R. Ab initio study of the absorption spectra of  $\text{Ag}_n$  ( $n= 5-8$ ) clusters. *J. Chem. Phys.* **2001**, *115*, 10450.
- (3) Lecoultre, S., Rydlo, A., Buttet, J., Félix, C., Gilb, S., Harbich, W. Ultraviolet-visible absorption of small silver clusters in neon:  $\text{Ag}_n$  ( $n= 1-9$ ). *J. Chem. Phys.* **2011**, *134*, 194108.
